# Supplementary material for: Mutation of active site glutamate in serine hydroxymethyltransferase allows trapping a reactive intermediate: a combined neutron and X-ray crystallography study
Source: Royal Society of Chemistry journal article supplement (doi:10.1039/d6ra01814a), 2026-05-07
Supplement: d6ra01814a1.pdf [file d6ra01814a1.pdf]

**SUPPORTING INFORMATION**

**Mutation of active site glutamate in serine hydroxymethyltransferase allows trapping a reactive intermediate: a combined neutron and X-ray crystallography study**

Victoria N. Drago,<sup>1</sup> Robert S. Phillips,<sup>2,3</sup> and Andrey Kovalevsky<sup>1\*</sup>

*<sup>1</sup>Neutron Scattering Division, Oak Ridge National Laboratory, Oak Ridge, TN, 37831, USA*

*<sup>2</sup>Department of Chemistry, University of Georgia, Athens, GA, 30602, USA*

*<sup>3</sup>Department of Biochemistry and Molecular Biology, University of Georgia, Athens, GA, 30602, USA*

\* To whom correspondence should be addressed: Andrey Kovalevsky: [kovalevskyay@ornl.gov](mailto:kovalevskyay@ornl.gov)

**Table S1.** Crystallographic data collection and refinement statistics for the X-ray and neutron structures of *Tth*SHMT E53Q. Values in parentheses are for the highest-resolution shell.

| <b><i>Tth</i>SHMT E53Q</b>                      |                                            |                           |
|-------------------------------------------------|--------------------------------------------|---------------------------|
|                                                 | Room Temp.<br>PDB ID 10YN                  |                           |
| <b>Data collection:</b>                         | <b>Neutron</b>                             | <b>X-ray</b>              |
| Beamline/Facility                               | IMAGINE (HFIR, ORNL)                       | Rigaku HighFlux HomeLab   |
| Space group                                     |                                            | P2 <sub>1</sub>           |
| Cell dimensions:                                |                                            |                           |
| <i>a, b, c</i> (Å); $\alpha, \beta, \gamma$ (°) | 58.82, 83.52, 95.43                        | 90.0, 91.6, 90.0          |
| Resolution (Å)                                  | 58.8 – 2.40 (2.52 – 2.40)                  | 95.4 – 1.65 (1.71 – 1.65) |
| No. reflections measured                        | 97943 (3784)                               | 413563 (25930)            |
| No. reflections unique                          | 28304 (1083)                               | 109873 (10773)            |
| $R_{\text{merge}}$                              | 0.183 (0.301)                              | 0.067 (0.361)             |
| $R_{\text{pim}}$                                | 0.101 (0.171)                              | 0.039 (0.251)             |
| $CC_{1/2}$                                      | 0.957 (0.686)                              | 0.967 (0.823)             |
| $\langle I / \sigma I \rangle$                  | 3.8 (2.3)                                  | 19.1 (2.5)                |
| Completeness (%)                                | 77.3 (62.4)                                | 99.1 (97.1)               |
| Redundancy                                      | 3.5 (3.1)                                  | 3.8 (2.4)                 |
| <hr/>                                           |                                            |                           |
| <b>Refinement:</b>                              | <b>Joint XN</b>                            |                           |
| Resolution (neutron, Å)                         | 40.0 – 2.40                                |                           |
| Resolution (X-ray, Å)                           | 40.0 – 1.65                                |                           |
| Data rejection criteria                         | no observation & $ F =0$                   |                           |
| Sigma cut-off                                   | 2.50                                       |                           |
| No. reflections (neutron)                       | 23605                                      |                           |
| No. reflections (X-ray)                         | 99395                                      |                           |
| $R_{\text{work}} / R_{\text{free}}$ (neutron)   | 0.236/0.263                                |                           |
| $R_{\text{work}} / R_{\text{free}}$ (X-ray)     | 0.189/0.197                                |                           |
| $R_{\text{work}} / R_{\text{free}}$ (joint XN)  | 0.198/0.208                                |                           |
| No. atoms                                       |                                            |                           |
| Protein, including H and D                      | 12563                                      |                           |
| Sulfate                                         | 10                                         |                           |
| Water                                           | 1515 (i.e. 505 D <sub>2</sub> O molecules) |                           |
| <i>B</i> -factors                               |                                            |                           |
| Protein                                         | 17.4                                       |                           |
| Sulfate                                         | 38.8                                       |                           |
| Water                                           | 40.3                                       |                           |
| R.M.S. deviations                               |                                            |                           |
| Bond lengths (Å)                                | 0.008                                      |                           |
| Bond angles (°)                                 | 1.10                                       |                           |

**Table S1 (cont'd).**

| <b><i>Tth</i>SHMT E53Q-Ser-THF</b>                  |                                |
|-----------------------------------------------------|--------------------------------|
| Room Temp.                                          |                                |
| PDB ID 10ZB                                         |                                |
| <b>Data collection:</b>                             | <b>X-ray (in-house)</b>        |
| Diffractionmeter                                    | Rigaku HighFlux, Eiger R<br>4M |
| Space group                                         | P2 <sub>1</sub>                |
| Wavelength (Å)                                      | 1.5406                         |
| Cell dimensions:                                    |                                |
| <i>a</i> , <i>b</i> , <i>c</i> (Å)                  | 58.9, 83.6, 95.3               |
| $\alpha$ , $\beta$ , $\gamma$ (°)                   | 90.0, 91.7, 90.0               |
| Resolution (Å)                                      | 95.30 – 1.80 (1.86 – 1.80)     |
| No. reflections unique                              | 85253 (8531)                   |
| <i>R</i> <sub>merge</sub>                           | 0.114 (0.325)                  |
| <i>R</i> <sub>pim</sub>                             | 0.058 (0.171)                  |
| <i>CC</i> <sub>1/2</sub>                            | 0.971 (0.870)                  |
| $\langle I / \sigma I \rangle$                      | 21.0 (4.6)                     |
| Completeness (%)                                    | 99.6 (99.6)                    |
| Redundancy                                          | 5.0 (4.6)                      |
| <b>Refinement:</b>                                  |                                |
| <i>R</i> <sub>work</sub> / <i>R</i> <sub>free</sub> | 0.157/0.185                    |
| <i>B</i> -factors                                   |                                |
| Protein                                             | 14.9                           |
| PLP-L-Ser                                           | 9.1                            |
| THF                                                 | 32.2                           |
| Acetate                                             | 23.2                           |
| Sulfate                                             | 52.4                           |
| Water                                               | 24.5                           |
| R.M.S. deviations                                   |                                |
| Bond lengths (Å)                                    | 0.009                          |
| Bond angles (°)                                     | 1.001                          |
| All atom clash score                                | 1.97                           |

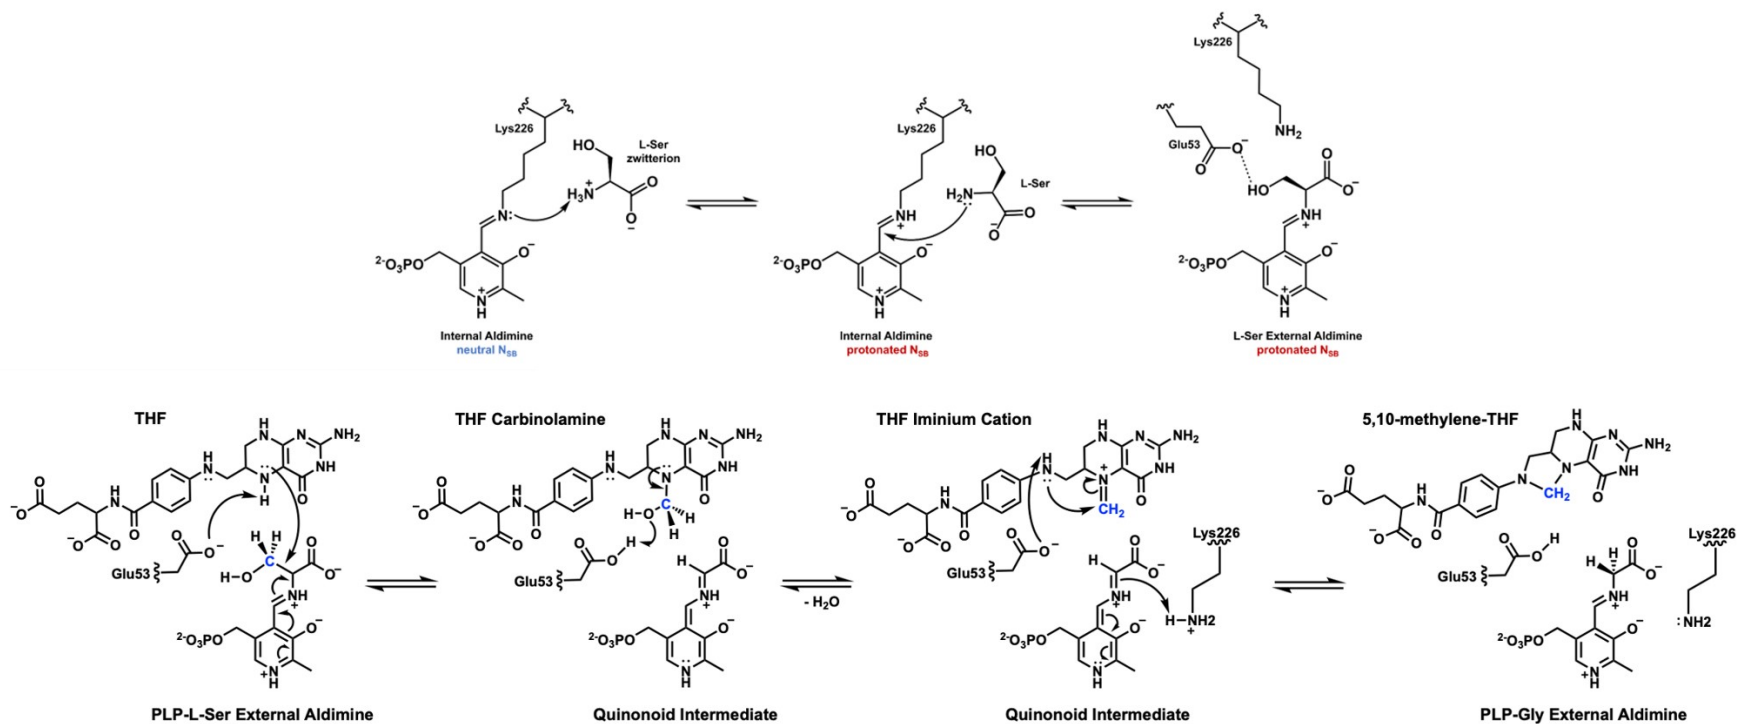

**Figure S1.** (top) The proposed mechanism for L-Ser attack on the Schiff base of the PLP internal aldimine that ultimately leads to the formation of the PLP-L-Ser external aldimine. (bottom) The proposed direct displacement mechanism for THF-dependent reaction catalyzed universally by the SHMT active site glutamate. The catalytic Lys carries out transformation of the PLP quinonoid intermediate into the PLP-Gly external aldimine (Drago et al. 2023, 2024).

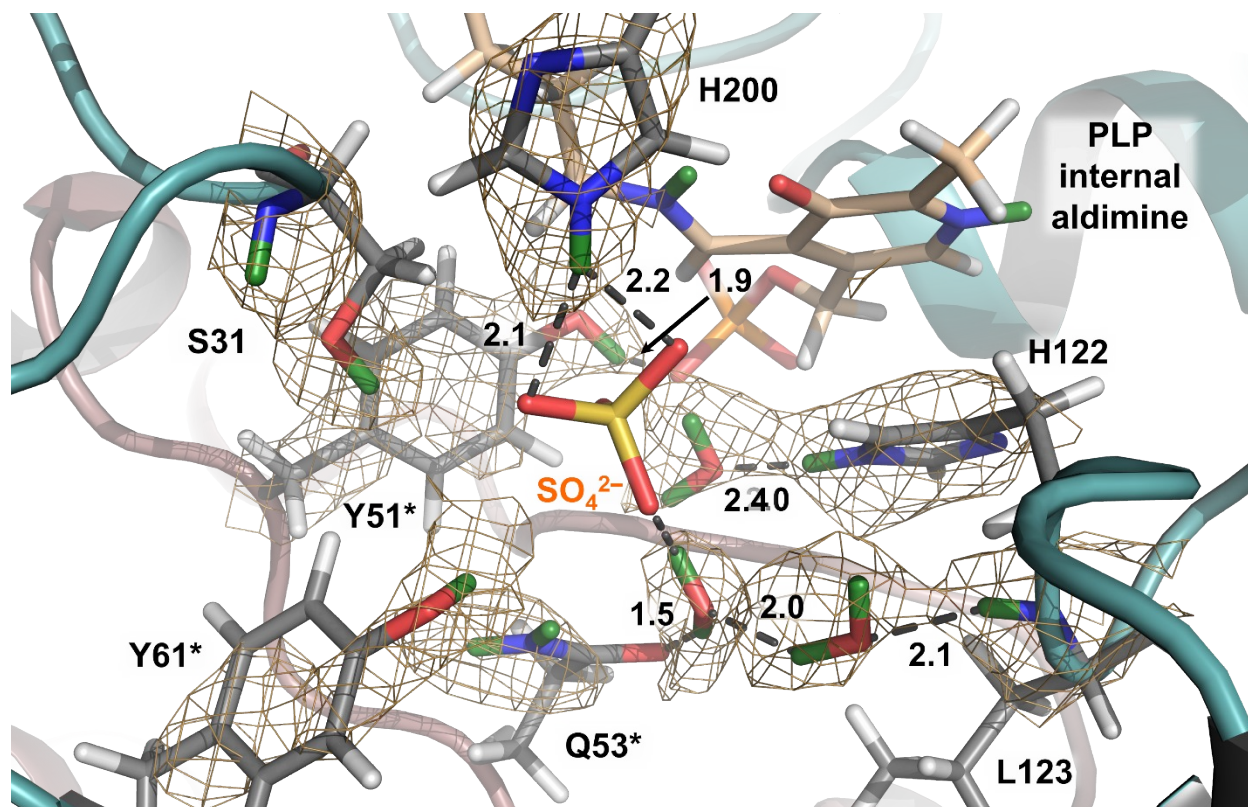

**Figure S2.** The  $2F_o - F_c$  neutron scattering length density map for the active site in *Tth*SHMT E53Q, shown as light brown mesh, is contoured at  $1.2 \sigma$  level. The figure highlights several  $D_2O$  water molecules and residues with partially H/D exchanged hydroxyl groups, including S31, Y51\*, Q53, and Y61\*. H atoms are colored white, and D atoms are green. Distances are in Angstroms.

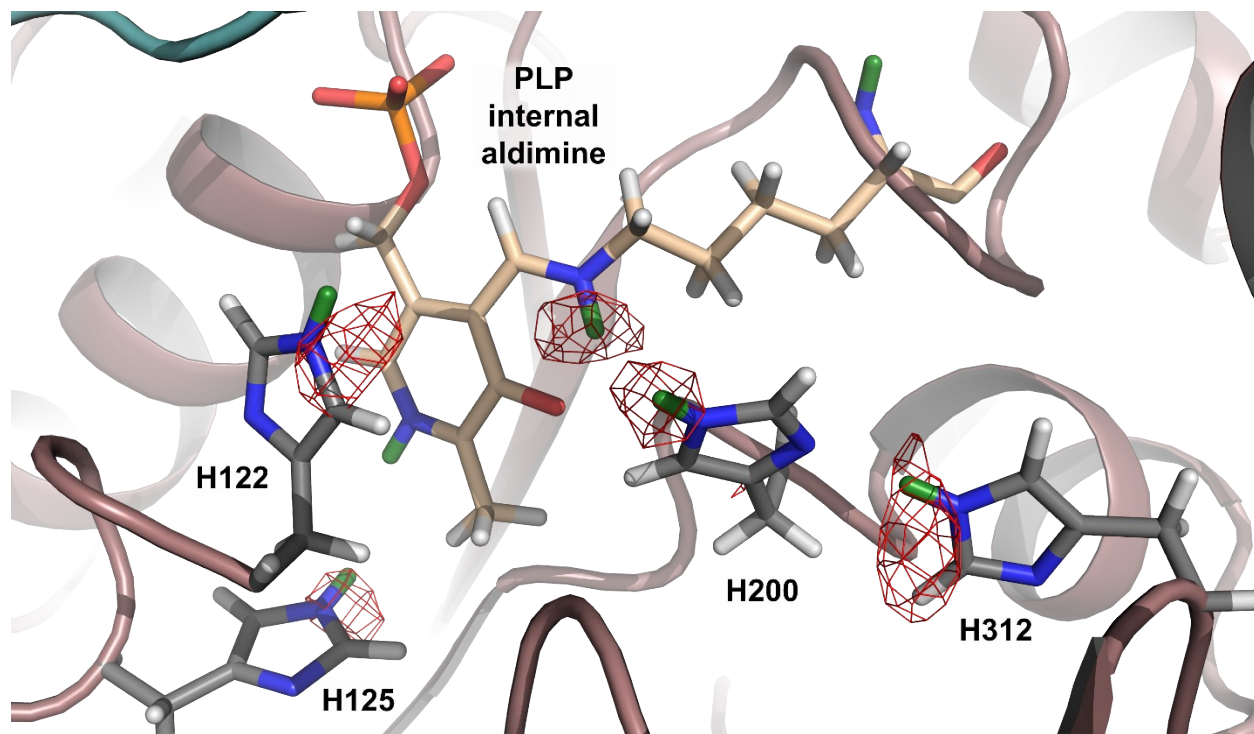

**Figure S3.** The  $F_O-F_C$  omit difference map for the His and PLP internal aldimine Schiff base D atoms contoured at  $2.5 \sigma$  level is shown in red mesh (protomer B). H atoms are colored white, and D atoms are green.

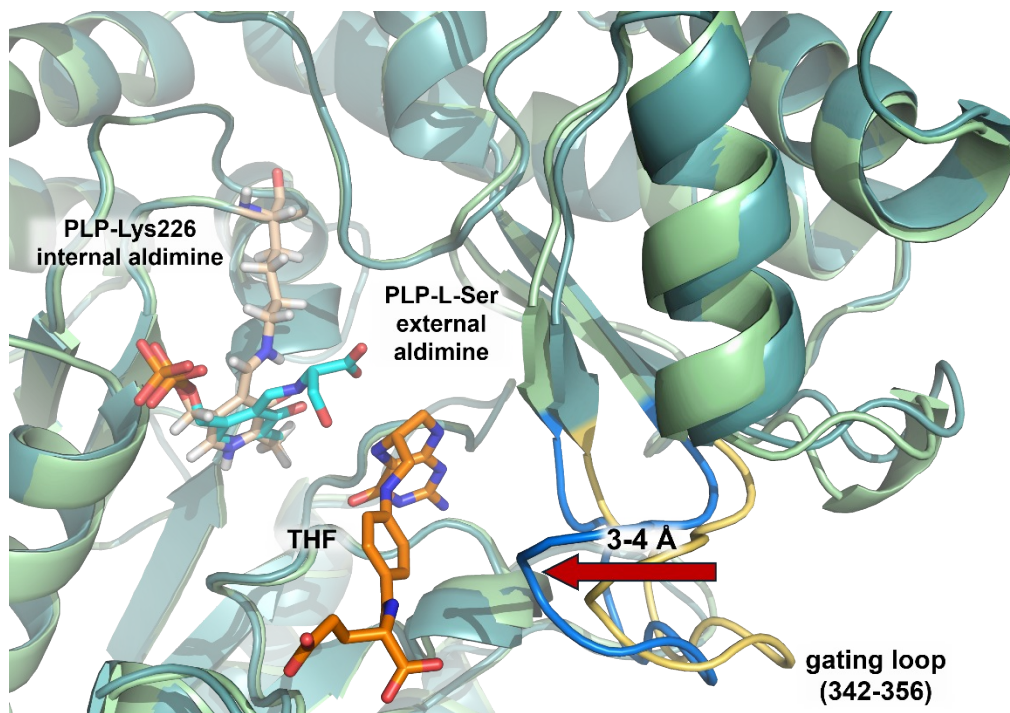

**Figure S4.** Superposition of E53Q holoenzyme (protomer A, cartoon colored in light teal) and E53Q-Ser-THF complex (protomer B, cartoon colored pale green) highlighting the locations of PLP internal aldimine, PLP-L-Ser external aldimine, THF and the gating loop motion upon THF binding from open conformation (colored light orange) to closed conformation (colored light blue). All atoms are colored by atom type.

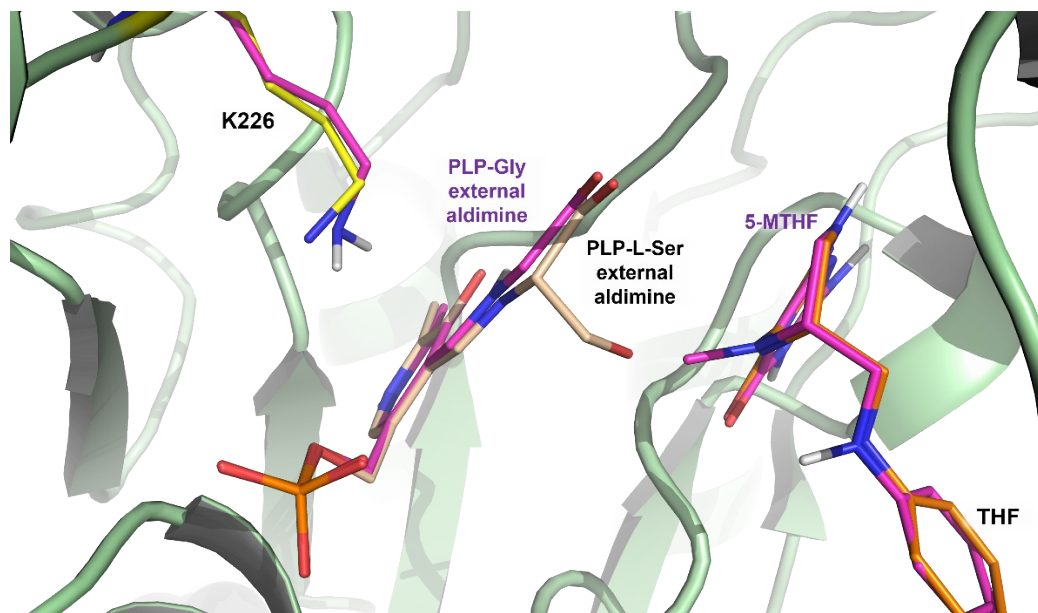

**Figure S5.** Superposition of E53Q-Ser-THF (protomer B, cartoon colored in pale green) and Gly-5MTHF complex (protomer B, cartoon not shown, PDB ID 5O5G) highlighting the locations of PLP-L-Ser and PLP-Gly external aldimines, THF, 5-MTHF and K226. All atoms are colored by atom type. Carbon atoms in Gly-5MTHF complex are colored magenta. For E53Q-Ser-THF, carbon atoms are yellow for K226, beige for PLP-L-Ser, and orange for THF.



## References

Drago VN, Campos C, Hooper M, Collins A, Gerlits O, Weiss KL, Blakeley MP, Phillips RS & Kovalevsky A (2023) Revealing protonation states and tracking substrate in serine hydroxymethyltransferase with room-temperature X-ray and neutron crystallography. *Commun Chem* 6, 162.

Drago VN, Phillips RS & Kovalevsky A (2024) Universality of critical active site glutamate as an acid-base catalyst in serine hydroxymethyltransferase function. *Chem Sci* 15, 12827-12844.
